# Supplementary material
Source: PubMed Central journal article supplement (PMC9790109)
Supplement: mmc1.pdf [file mmc1.pdf]

# Supplementary Fig. 1

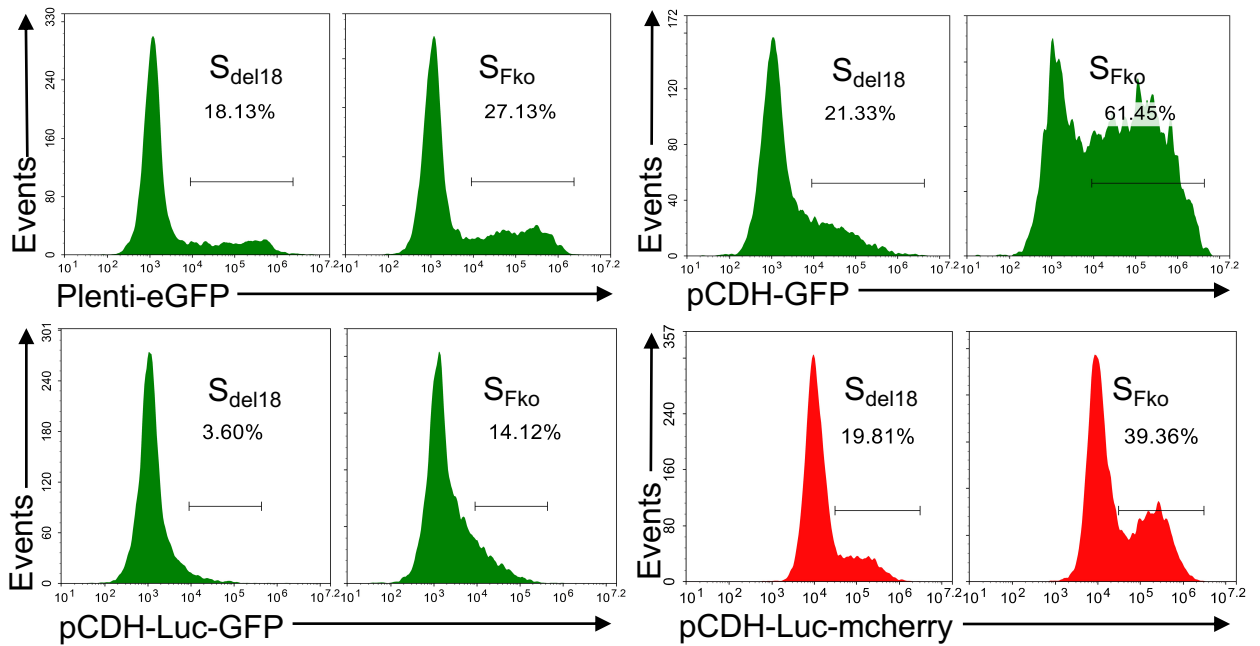

**Supplementary Fig. 1** Validation of the Furin cleavage site deletion enhanced PVs infection with plenti-eGFP, pCDH-GFP, pCDH-Luc-GFP, pCDH-Luc-mcherry et al vectors by flow analysis. Infection efficiency was higher in S<sub>Fko</sub> PVs than in S<sub>del18</sub> PVs with all vectors. FITC channel detected eGFP/GFP fluorescent protein (530/30nm). PE-Texas Red channel detected mCherry fluorescent protein (615/20nm).
